# Supplementary material for: Specific Heat Capacity of Confined Water in Extremely Narrow Graphene Nanochannels
Source: Frontiers journal article supplement (doi:10.3389/fenrg.2021.736713), 2021-10-08
Supplement: Data_Sheet_1.pdf [file Data_Sheet_1.pdf]

## *Supplementary Material*

# **Specific Heat Capacity of Confined Water in Extremely Narrow Graphene Nanochannels**

Runfeng Zhou, Xinyi Ma, Haoxun Li, Chengzhen Sun\*, Bofeng Bai

State Key Laboratory of Multiphase Flow in Power Engineering, Xi'an Jiaotong University,  
Xi'an, 710049, China

\*Corresponding author. Email: [sun-cz@xjtu.edu.cn](mailto:sun-cz@xjtu.edu.cn)

## **Content**

|                                                                         |   |
|-------------------------------------------------------------------------|---|
| 1. Independence checks .....                                            | 2 |
| 2. Density Distribution.....                                            | 5 |
| 3. Radial Distribution Function $g(r)$ .....                            | 6 |
| 4. High $n_{\text{hbond}}$ in the nanochannel of $H = 1.4 \sigma$ ..... | 7 |

## 1. Independence checks

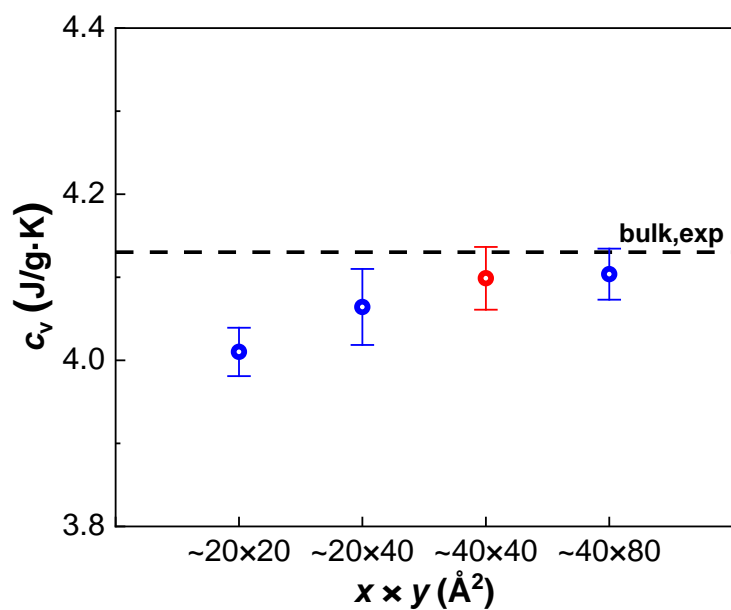

**Figure S1 Independence check for box size.** A box size of about  $40 \times 40 \text{ \AA}$  is precise enough to eliminate the boundary effects.

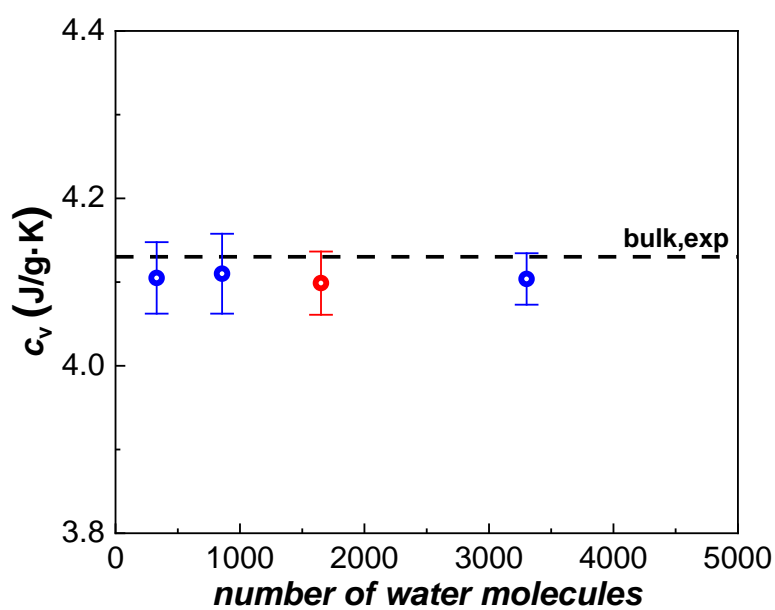

**Figure S2 Independence check for number of water molecules.** The specific heat capacity is not sensitive to the number of water molecules.

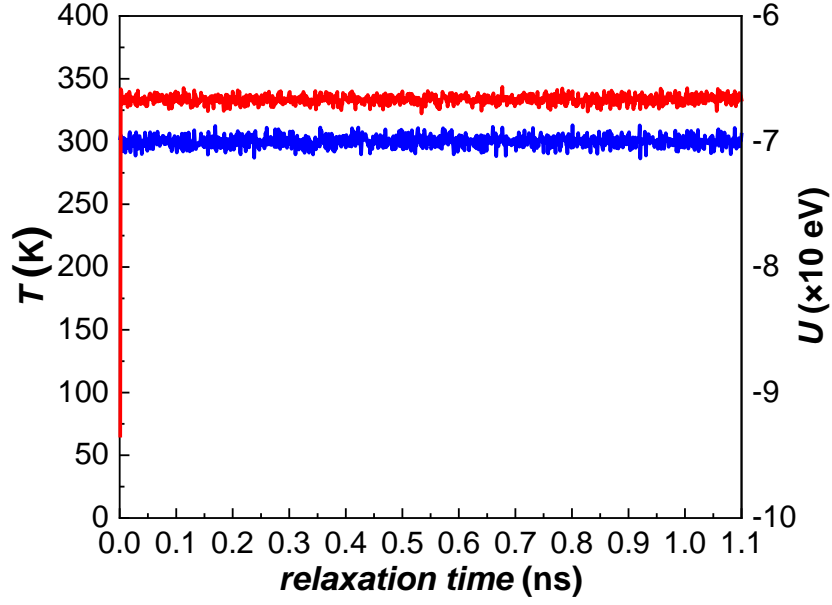

**Figure S3 Independence check for relaxation time.** Both temperature and internal energy of the simulation system converge fast. Thus, a relaxation time of 1.1 ns is long enough to reach an equilibrium state.

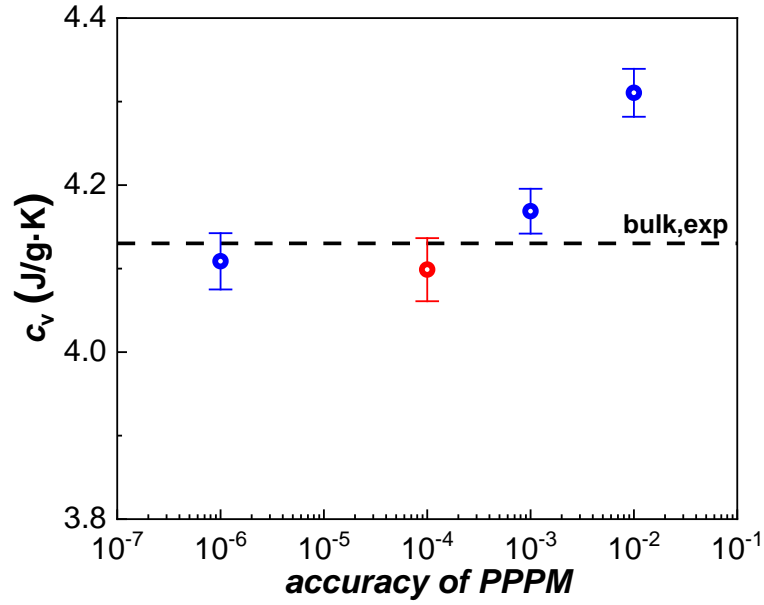

**Figure S4 Independence check for accuracy of PPPM.** A convergence accuracy of  $10^{-4}$  of PPPM is precise enough to match the experimental value of specific heat capacity of bulk water and thus is chosen in this work.

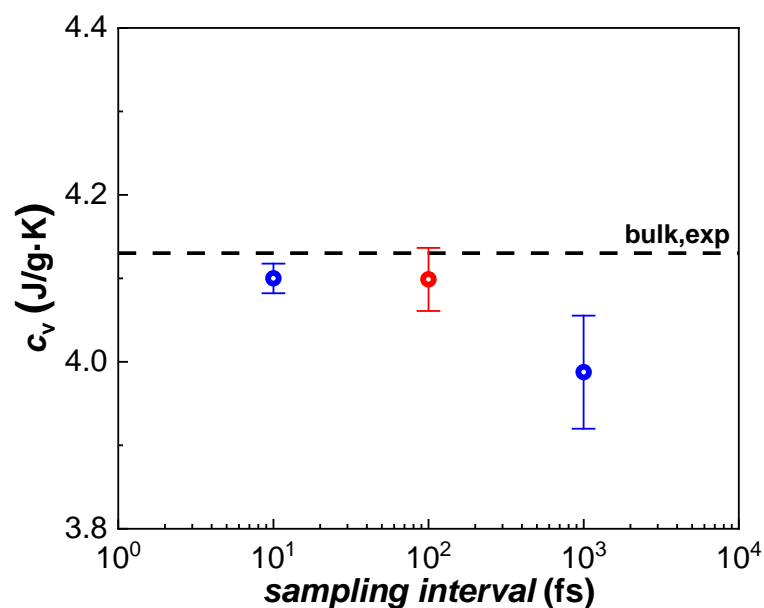

**Figure S5 Independence check for sampling time.** A sampling interval of 100 fs is precise enough to match the experimental value of specific heat capacity of bulk water and thus is chosen in this work.

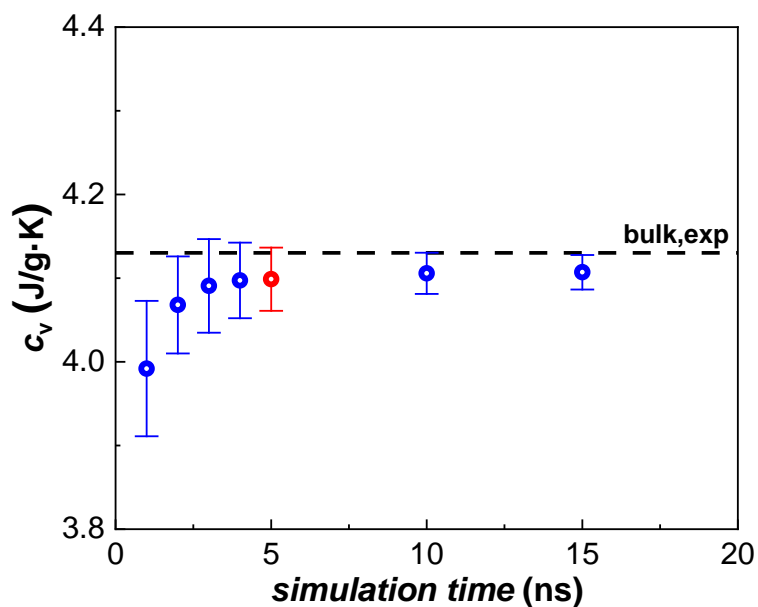

**Figure S6 Independence check for simulation time.** A simulation time of 5 ns is long enough to match the experimental value of specific heat capacity of bulk water and thus is chosen in this work.

## 2. Density Distribution

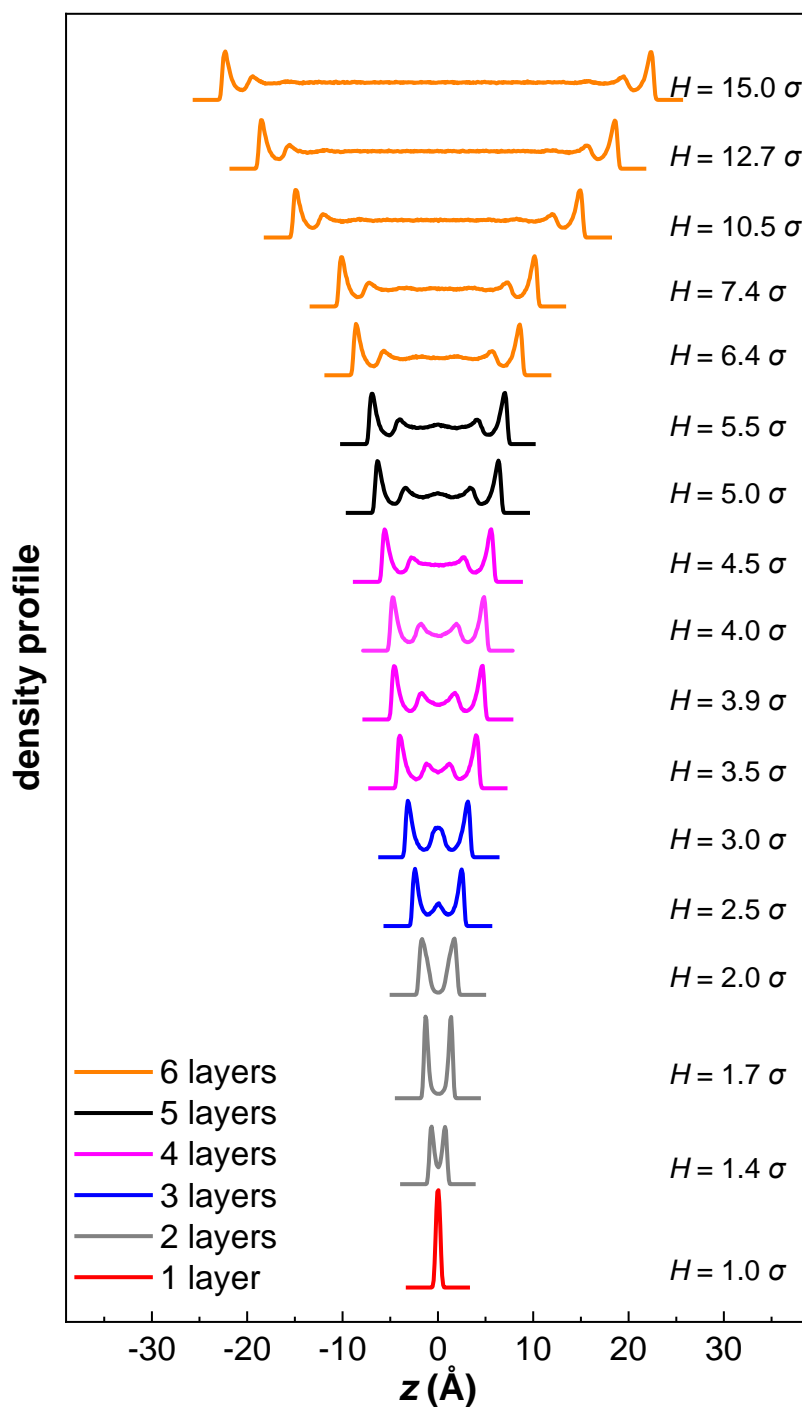

**Figure S7 Density distributions of water in nanochannels.** Water forms as layers in nanochannels where a density peak corresponds to a water layer. The number of water layer can be the same at different channel heights within a certain range but the distance among them are difference. Thus, the properties of water including  $c_v$  oscillate on local.

### 3. Radial Distribution Function $g(r)$

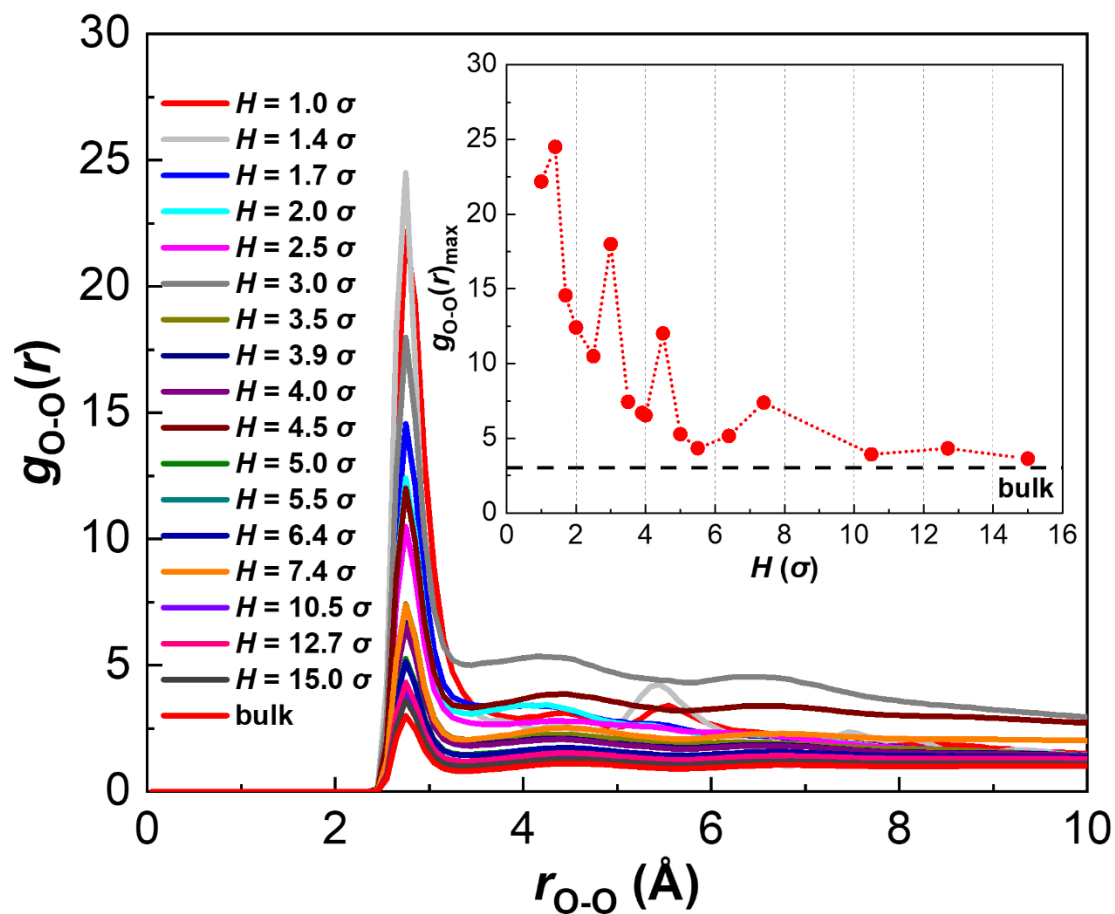

**Figure S8 Radial distribution function  $g_{O-O}(r)$  of water molecules (take oxygen as example) in nanochannels.** The negative relationship between  $c_v$  of water confined in different nanochannels and the first peak of  $g_{O-O}(r)$ , namely,  $g_{O-O}(r)_{\max}$  in the inset, explain the size-dependent  $c_v$  of nanoconfined water. And the local highest  $g_{O-O}(r)_{\max}$  generally corresponding to the local lowest  $c_v$  explains the commensurability of  $c_v$ .

#### 4. High $n_{\text{hbond}}$ in the nanochannel of $H = 1.4 \sigma$

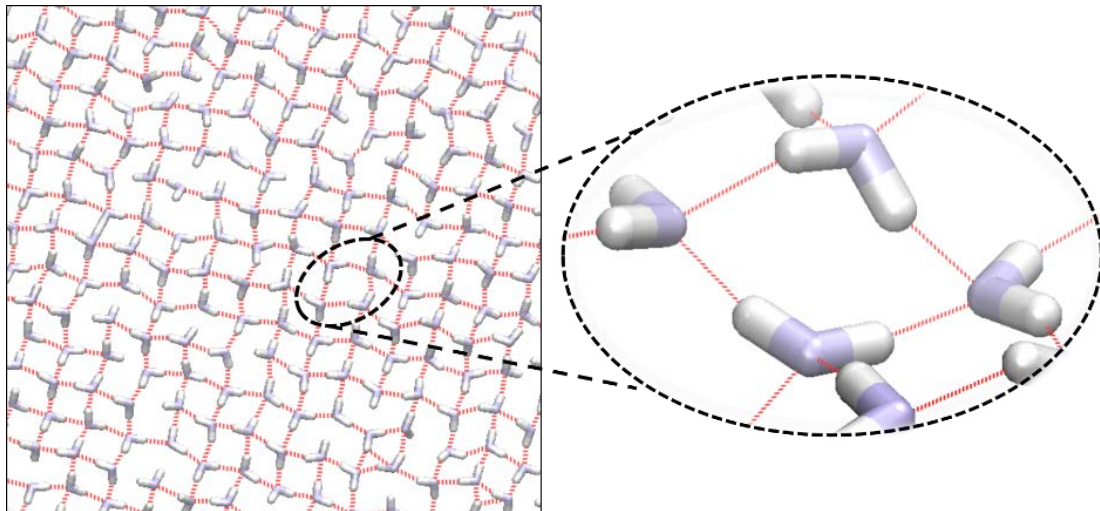

**Figure S9 Special structure of confined water in channel of  $H = 1.4 \sigma$ .** Generally,  $n_{\text{hbond}}$  in nanoconfined water are lower than the bulk value. However, in the channel with height of  $1.4 \sigma$ ,  $n_{\text{hbond}}$  is abnormal and extraordinarily high, reported as  $3.45016 \pm 0.04807$ , causing by its special structure, which allows water molecules connecting with hydrogen bonds sufficiently.
